# Supplementary material for: A ROS storm generating nanocomposite for enhanced chemodynamic therapy through H2O2 self-supply, GSH depletion and calcium overload
Source: Royal Society of Chemistry journal article supplement (doi:10.1039/d3nr06422k), 2024-01-01
Supplement: d3nr06422k1.pdf [file d3nr06422k1.pdf]

**Electronic Supplementary Information for**  
**A ROS Storm Generating Nanocomposite for Enhanced**  
**Chemodynamic Therapy *via* H<sub>2</sub>O<sub>2</sub> Self-Supply, GSH Depletion and**  
**Calcium Overload**

Yong Li<sup>a</sup>, Jing Wang<sup>a</sup>, Tao Zhu<sup>a</sup>, Ying Zhan<sup>b</sup>, Xiaoli Tang<sup>a</sup>, Jianying Xi<sup>a</sup>, Xiaohui  
Zhu<sup>a</sup>, Yong Zhang<sup>c\*</sup> and Jinliang Liu<sup>a\*</sup>

<sup>a</sup> School of Environmental and Chemical Engineering, Shanghai University, Shanghai, China, 200444.

<sup>b</sup> School of Life Science, Shanghai University, Shanghai, China, 200444.

<sup>c</sup> Department of Biomedical Engineering, City University of Hong Kong, 83 Tat Chee Avenue, Kowloon, Hong Kong.

yozhang@cityu.edu.hk (Yong Zhang) and [liujl@shu.edu.cn](mailto:liujl@shu.edu.cn) (Jinliang Liu)

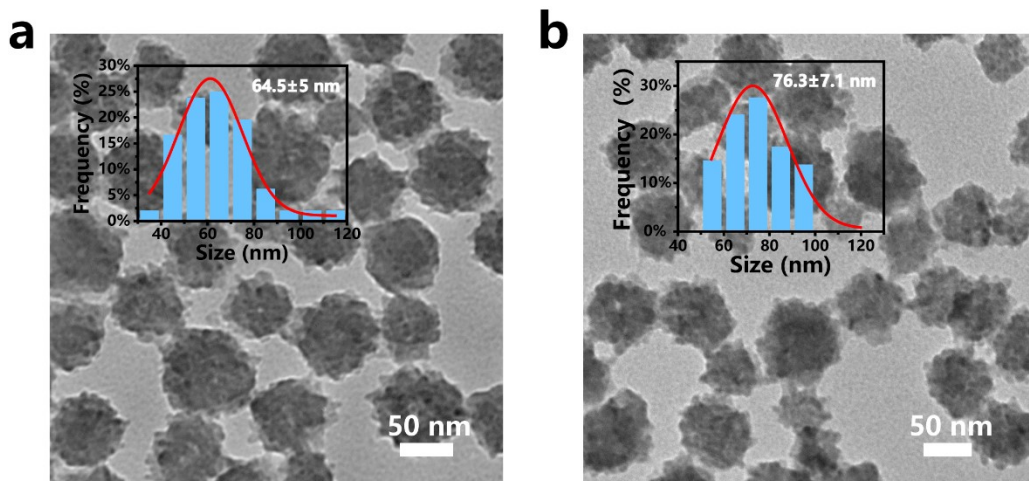

**Figure S1.** TEM images of (a)  $\text{CaO}_2$  and (b)  $\text{CaO}_2\text{@Cu}$ . The  $\text{CaO}_2$  nanoparticles feature a spheroidal morphology with well-defined size distribution of approximately 70 nm, the  $\text{CaO}_2\text{@Cu}$  NPs prepared exhibited enhanced dispersion, as evidenced by their average diameter of approximately 80 nm.

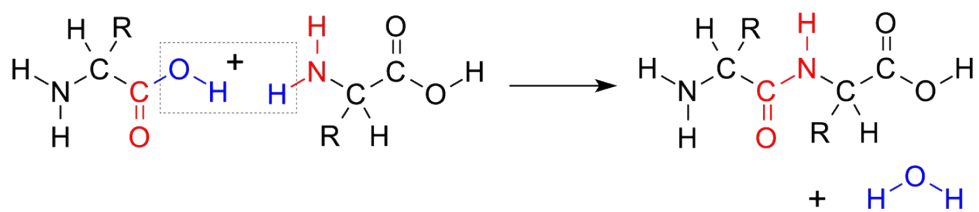

**Figure S2.** Dehydration condensation reaction between BSO molecules and  $\text{CaO}_2\text{@Cu}$  NPs.

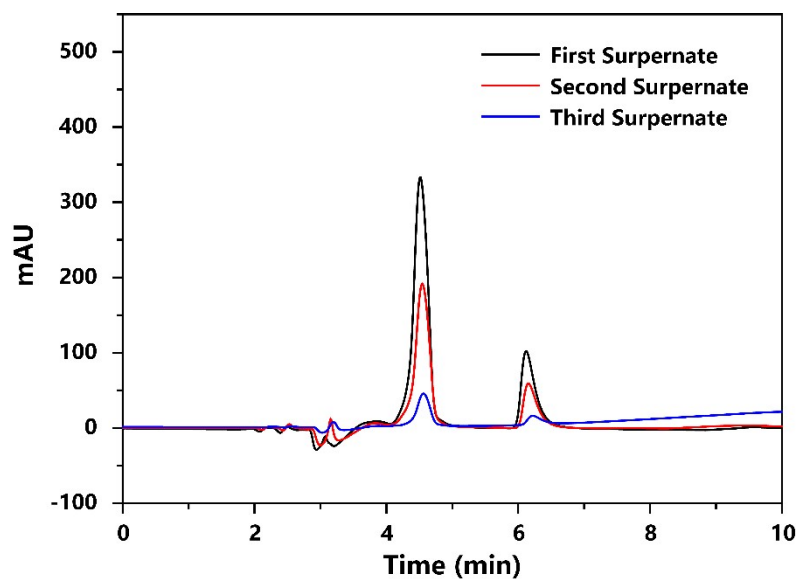

**Figure S3.** HPLC spectra of different samples.

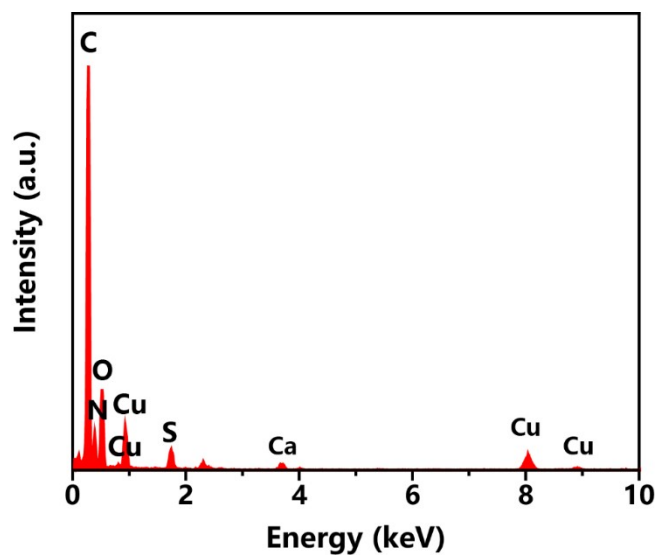

**Figure S4.** EDS spectrum of  $\text{CaO}_2@$ Cu-BSO NPs. Signals of N and S elements appeared in the elemental mapping, and EDS spectrum of  $\text{CaO}_2@$ Cu-BSO NPs showed the successful grafting of BSO molecules.

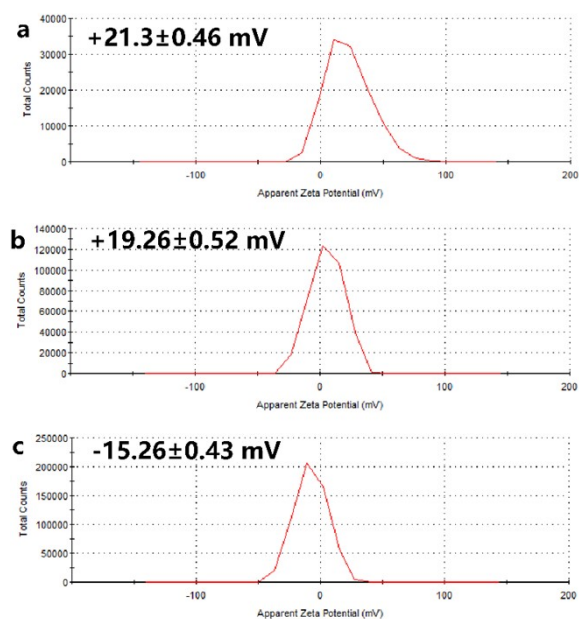

**Figure S5.** The apparent zeta potentials of (a)  $\text{CaO}_2$ , (b)  $\text{CaO}_2@Cu$  and (c)  $\text{CaO}_2@Cu$ -BSO. The surface zeta potentials of NPs changed from +21.3 to  $-15.26$  mV after the introduction of negatively charged BSO grafted onto the particle surface.

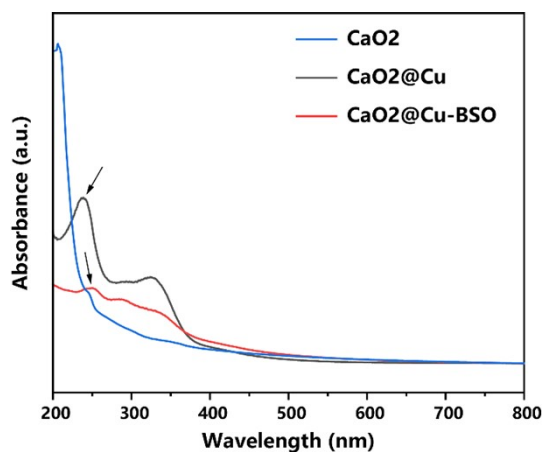

**Figure S6.** UV-vis spectra of  $\text{CaO}_2$ ,  $\text{CaO}_2@Cu$  and  $\text{CaO}_2@Cu$ -BSO.  $\text{CaO}_2@Cu$  and  $\text{CaO}_2@Cu$ -BSO appear characteristic peaks at 239 nm and 252 nm in the UV-visible spectrum respectively.

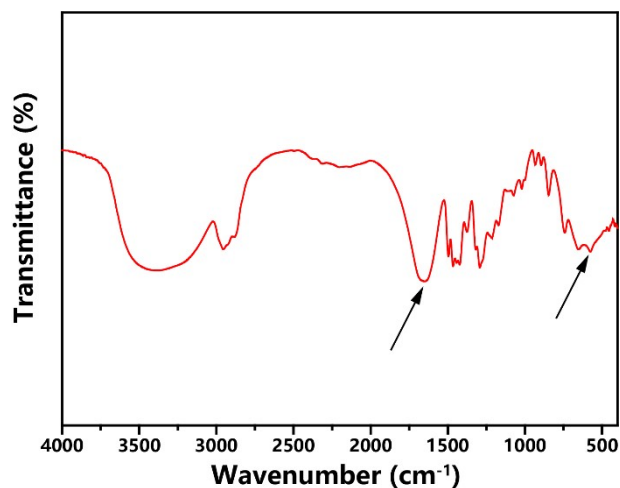

**Figure S7.** FT-IR spectra of CaO<sub>2</sub> nanospheres. The characteristic peak at 573.2 cm<sup>-1</sup> is due to the O-Ca-O vibration. The absorption peak at about 1630.1 cm<sup>-1</sup> is attributed to the stretching of the C = O bond, demonstrating the weak chemical coordination of PVP.

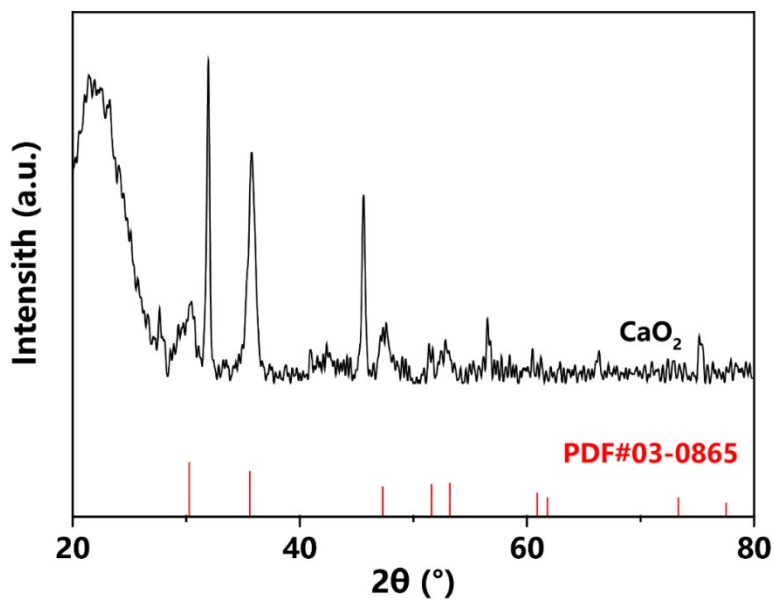

**Figure S8.** XRD patterns of CaO<sub>2</sub>.

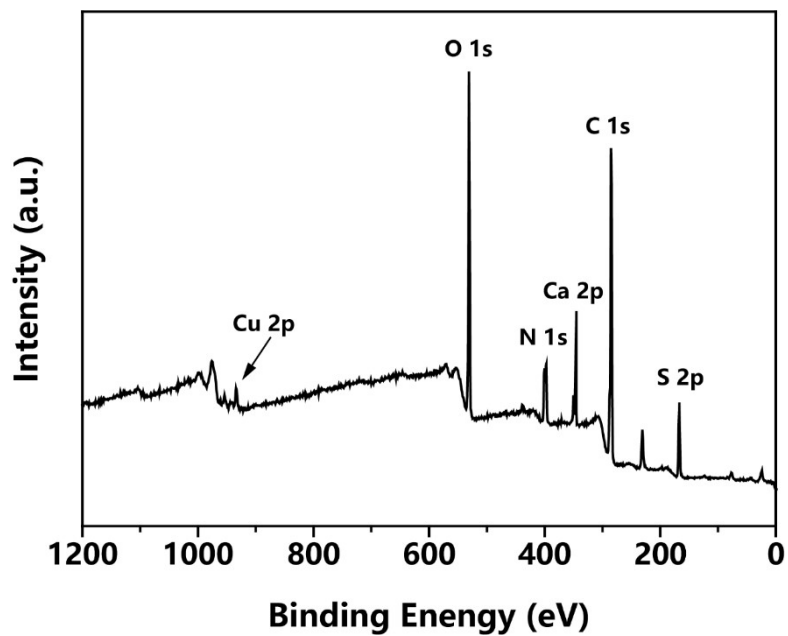

**Figure S9.** Full XPS spectrum of CaO<sub>2</sub>@Cu-BSO NPs.

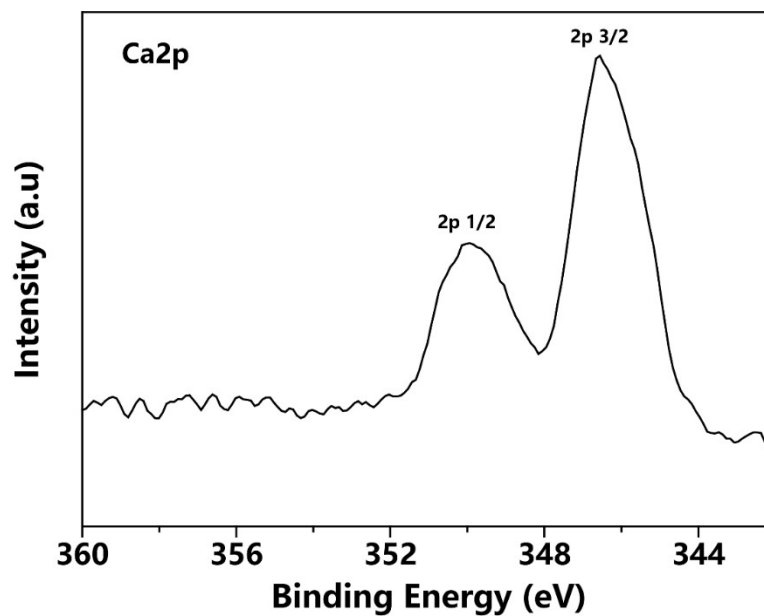

**Figure S10.** Ca 2p XPS spectrum of CaO<sub>2</sub>.

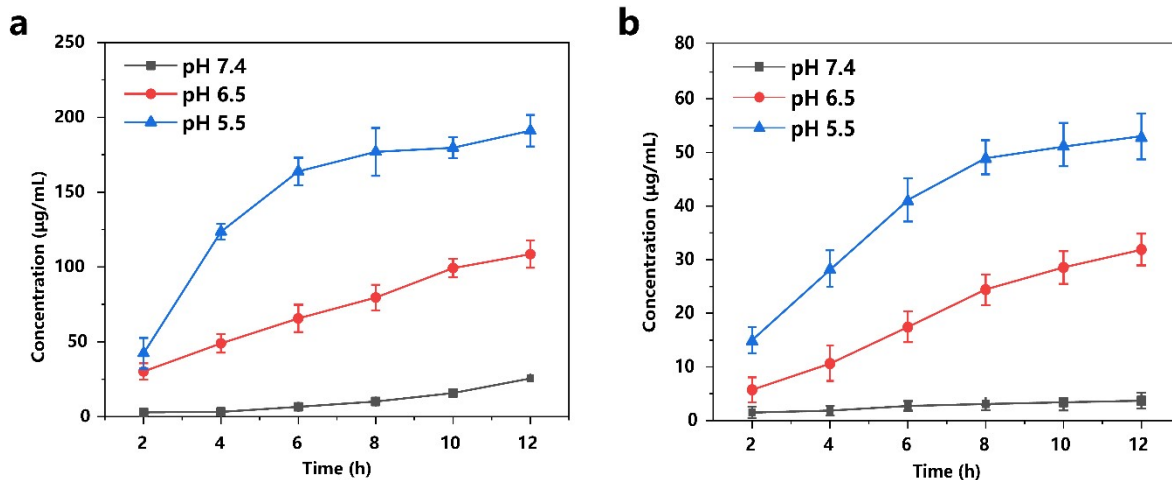

**Figure S11.** *In vitro* releases of (a) Ca<sup>2+</sup> and (b) Cu<sup>2+</sup> from CaO<sub>2</sub>@Cu-BSO dispersed in solutions with different pH values (mean ± SD, n=3).

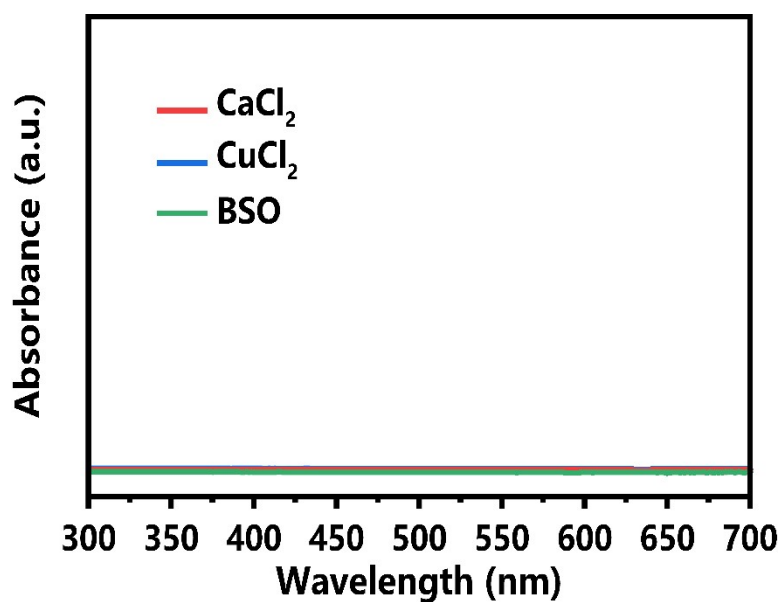

**Figure S12.** UV-vis absorbance spectra of Ti(SO<sub>4</sub>)<sub>2</sub> solution in presence of CaCl<sub>2</sub>, CuCl<sub>2</sub> and BSO (100 µg/mL for each agent).

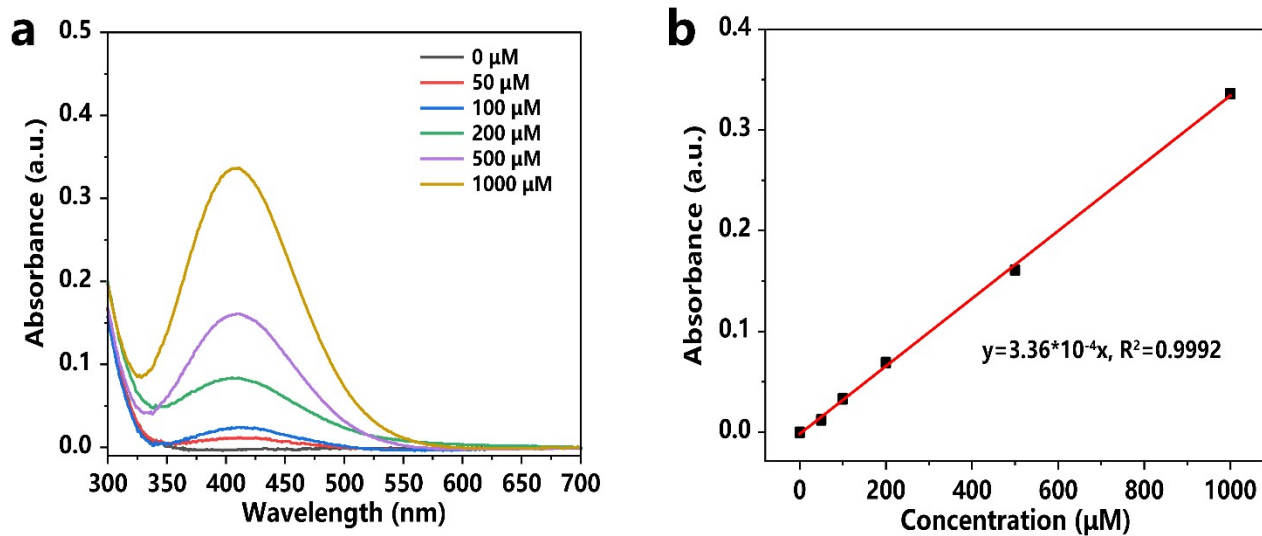

**Figure S13.** (a) UV-vis absorption spectra of  $\text{Ti}(\text{SO}_4)_2$  solution mixed with various concentrations of  $\text{H}_2\text{O}_2$ . (b) Plot of absorbance versus concentrations of  $\text{H}_2\text{O}_2$ , based on the different absorbance at 410 nm wavelength.



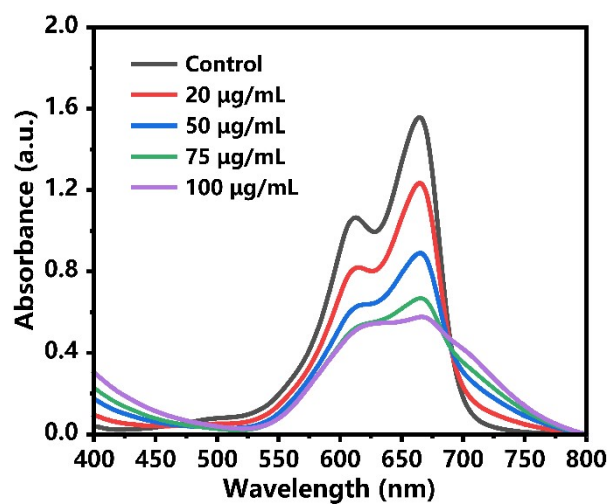

**Figure S14.** UV–Vis spectra of MB incubated with CaO<sub>2</sub>@Cu-BSO NPs containing different concentrations.

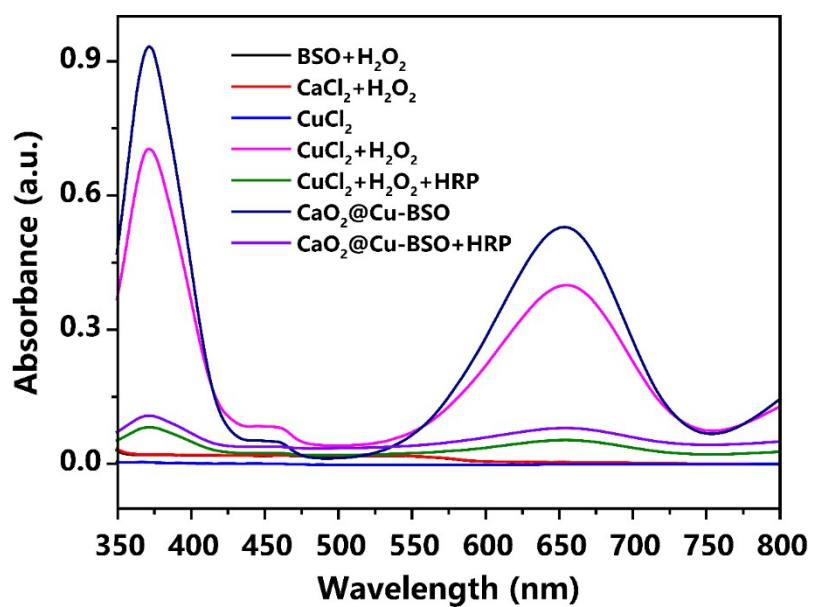

**Figure S15.** UV–vis absorbance spectra of ox-TMB in the presence of various samples.

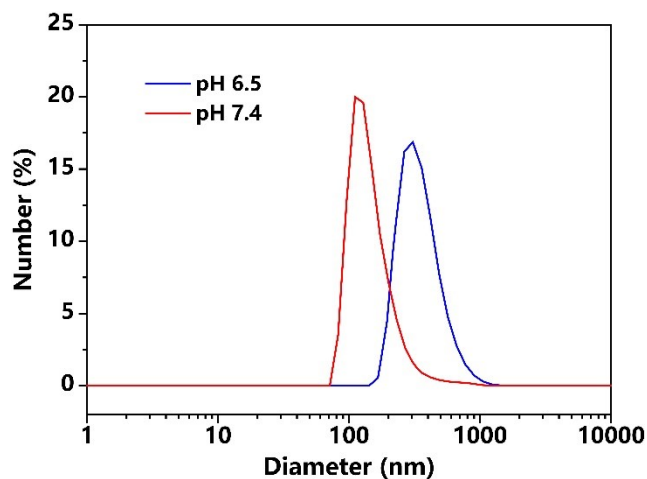

**Figure S16.** DLS results of CaO<sub>2</sub>@Cu-BSO NPs incubated in 1640 media for 12 h under different pH.

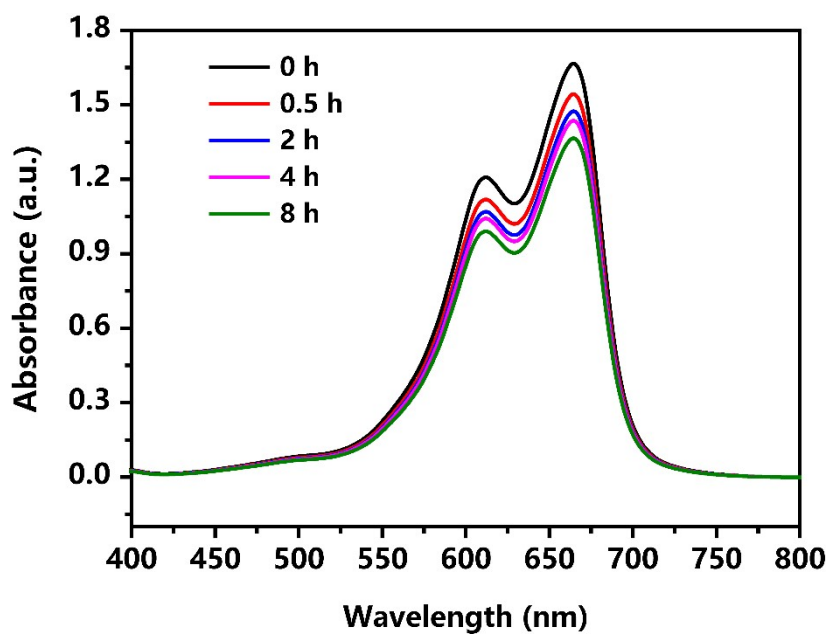

**Figure S17.** UV-Vis spectra of MB incubated with H<sub>2</sub>O<sub>2</sub> under different time.

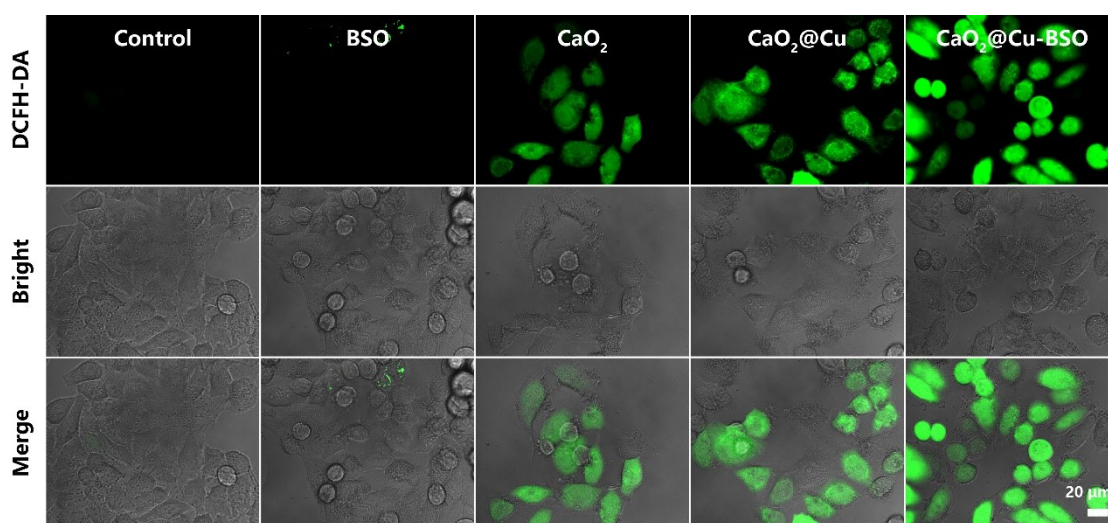

**Figure S18.** Fluorescence image of A549 cells incubated with BSO after DCFH-DA staining for ROS detection (CaO<sub>2</sub> concentration was unified at 50 μg/mL).

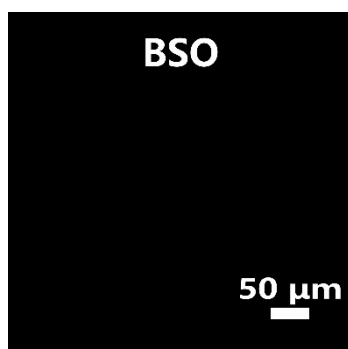

**Figure S19.** Fluorescence image of A549 cells incubated with BSO after DCFH-DA staining for ROS detection.

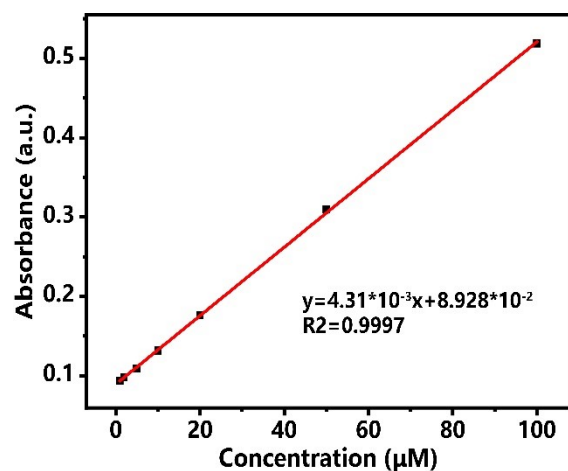

**Figure S20.** Plot of absorbance versus concentrations of H<sub>2</sub>O<sub>2</sub>, based on the H<sub>2</sub>O<sub>2</sub> Kit.

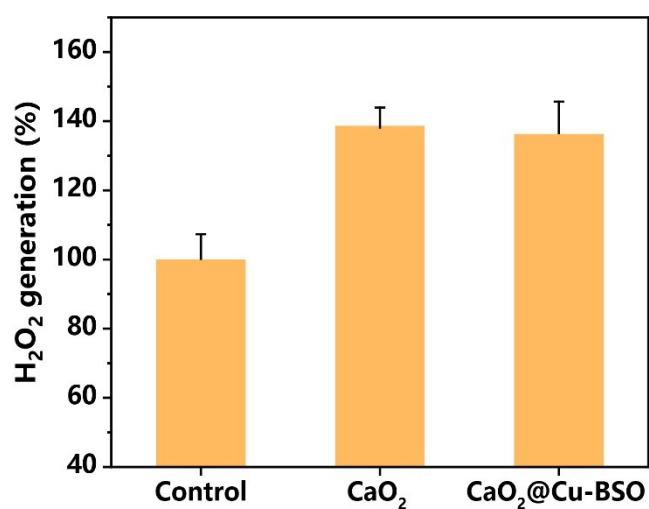

**Figure S21.** Comparison of intracellular H<sub>2</sub>O<sub>2</sub> in A549 cells cultured with CaO<sub>2</sub>@Cu-BSO NPs or CaO<sub>2</sub> NPs (CaO<sub>2</sub> concentration was unified at 50 µg/mL, mean ± SD, n = 3.).

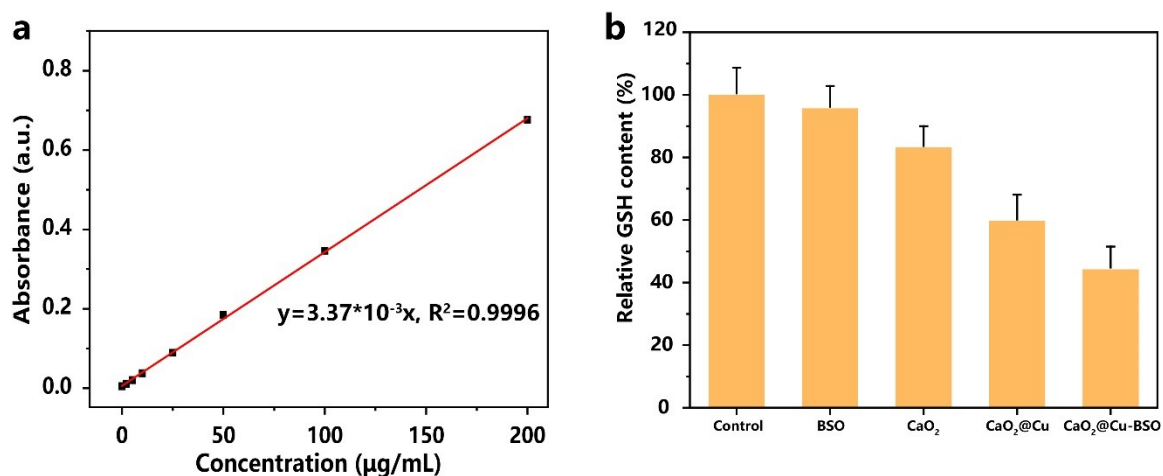

**Figure S22.** (a) Plot of absorbance versus concentrations of GSH, based on the GSH Kit. (b) Intracellular GSH level in A549 treated with different samples (CaO<sub>2</sub> concentration was unified at 50 µg/mL, mean ± SD, n = 3).

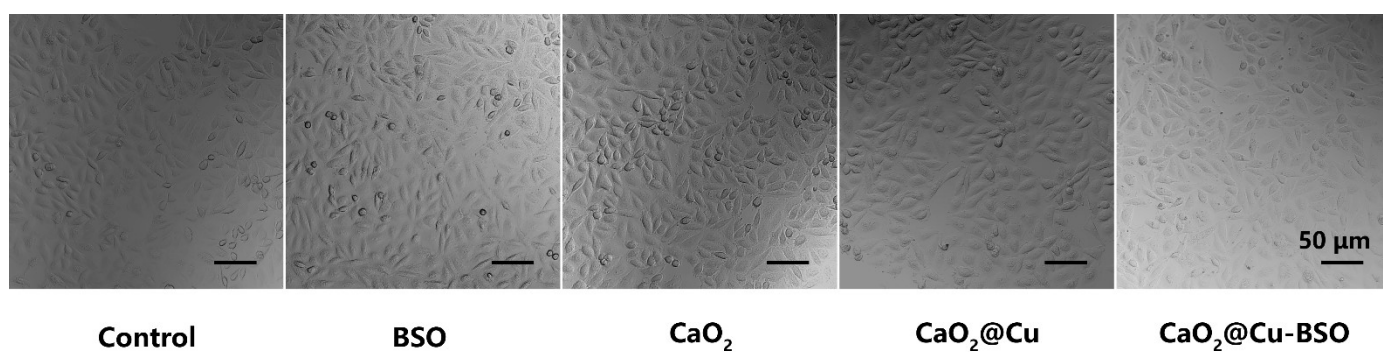

**Figure S23.** Bright field images of A549 cells incubated with different samples after NDA staining for GSH detection.

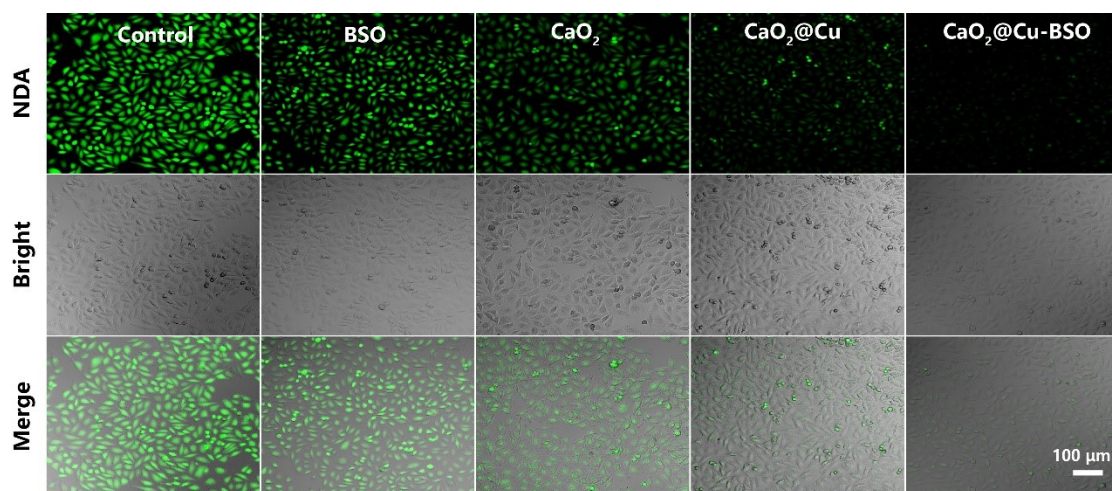

**Figure S24.** Images of A549 cells incubated with different samples after NDA staining for GSH detection ( $\text{CaO}_2$  concentration was unified at  $50 \mu\text{g/mL}$ ).

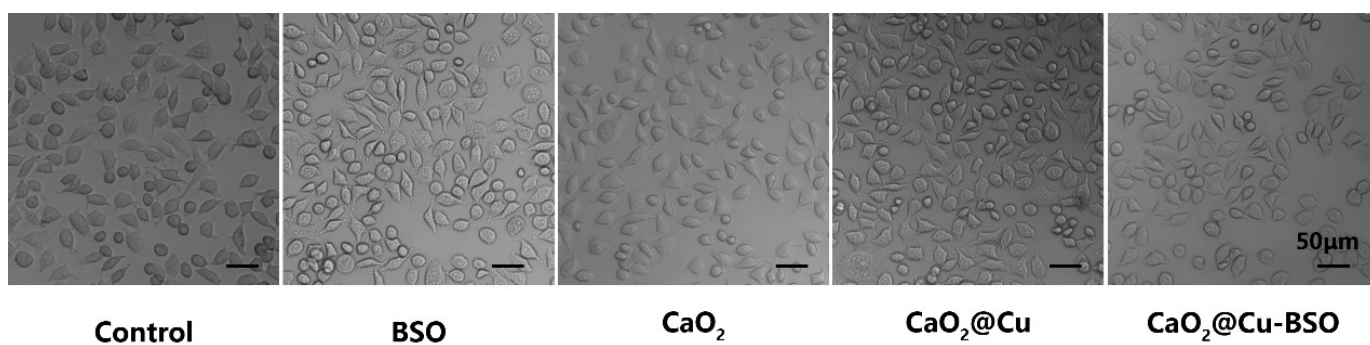

**Figure S25.** Bright field images of A549 cells incubated with different samples after Fluo-4 AM staining for intercellular  $\text{Ca}^{2+}$  accumulation.

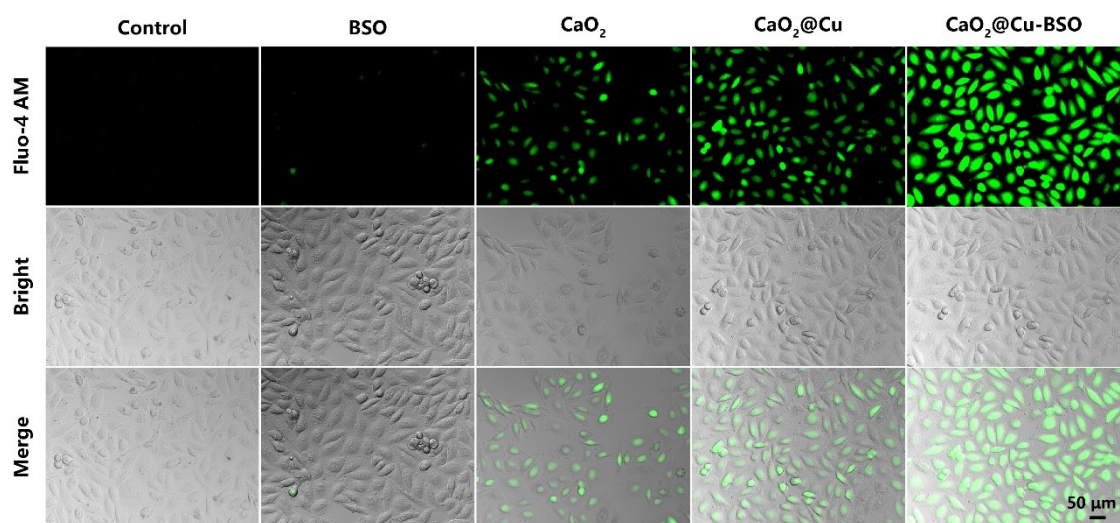

**Figure S26.** Images of A549 cells incubated with different samples after Fluo-4 AM staining for intercellular Ca<sup>2+</sup> accumulation (CaO<sub>2</sub> concentration was unified at 50 μg/mL).

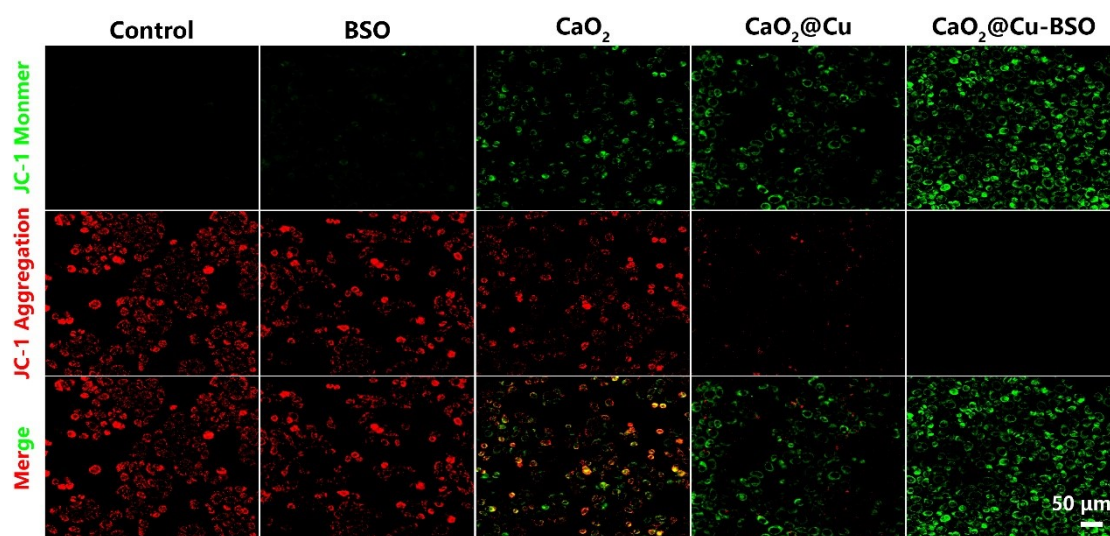

**Figure S27.** CLSM images of JC-1 assays of A549 cells under different conditions (CaO<sub>2</sub> concentration was unified at 50 μg/mL).

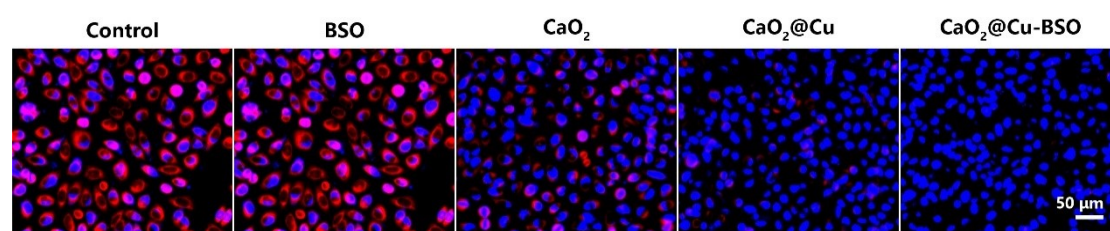

**Figure S28.** CLSM images of A549 cells treated with different samples and then stained with MitoTracker Red and Hoechst 33258 (CaO<sub>2</sub> concentration was unified at 50 μg/mL).



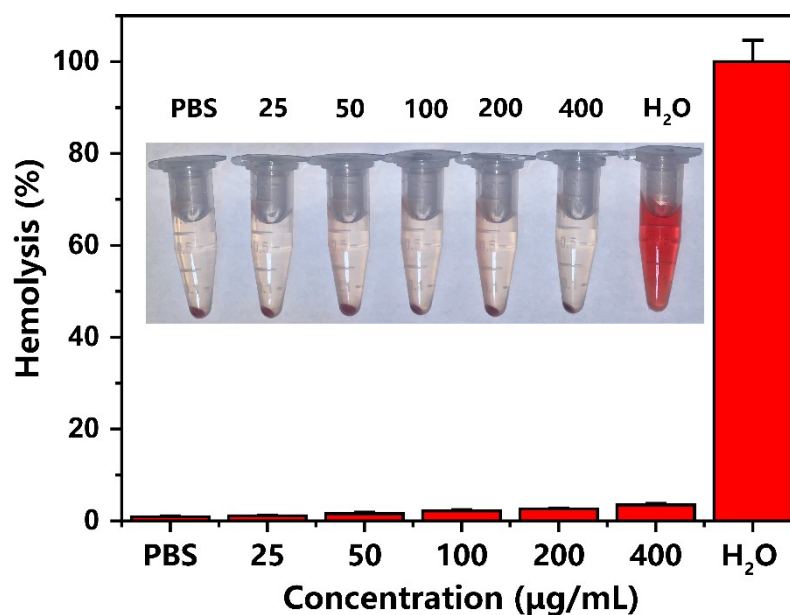

**Figure S29.** Hemolysis analysis of CaO<sub>2</sub>@Cu-BSO NPs suspension at various concentrations (mean ± SD, n=3).

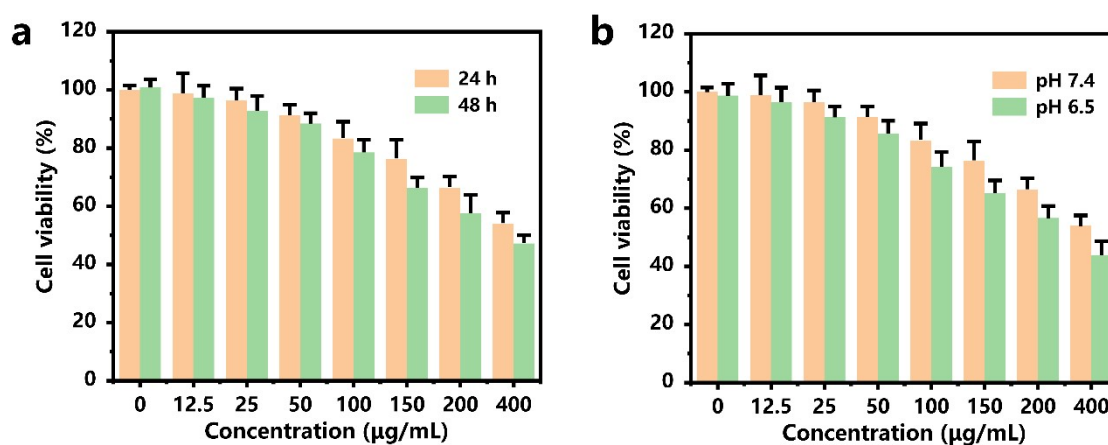

**Figure S30.** (a) Cell viabilities of A549 cells treated with different concentrations of CaO<sub>2</sub>@BSO NPs for 24 and 48 h. (c) Cell viabilities of A549 cells treated with different concentrations of CaO<sub>2</sub>@BSO NPs at pH 7.4 and pH 6.5 (mean ± SD, n=3).

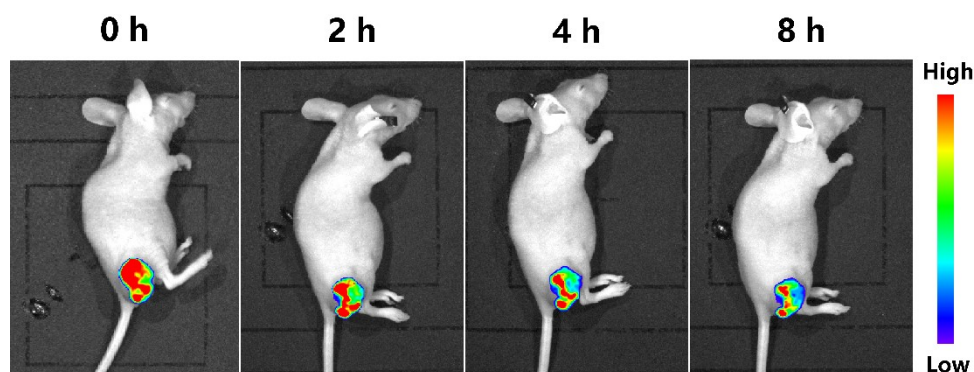

**Figure S31.** Fluorescence images of tumor-bearing mice after intratumoral injection with Rb labeled  $\text{CaO}_2@Cu$ -BSO NPs for different times.

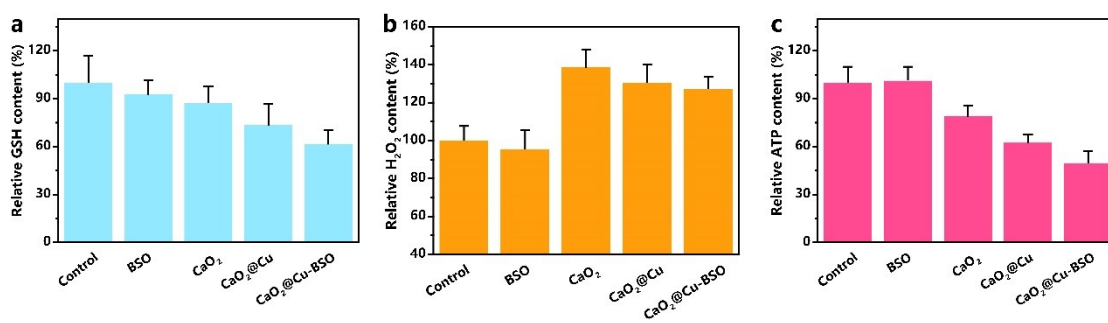

**Figure S32.** (a) GSH, (b)  $\text{H}_2\text{O}_2$  and (c) ATP content determination of the tumor regions from different groups (mean  $\pm$  s.d., n = 3).

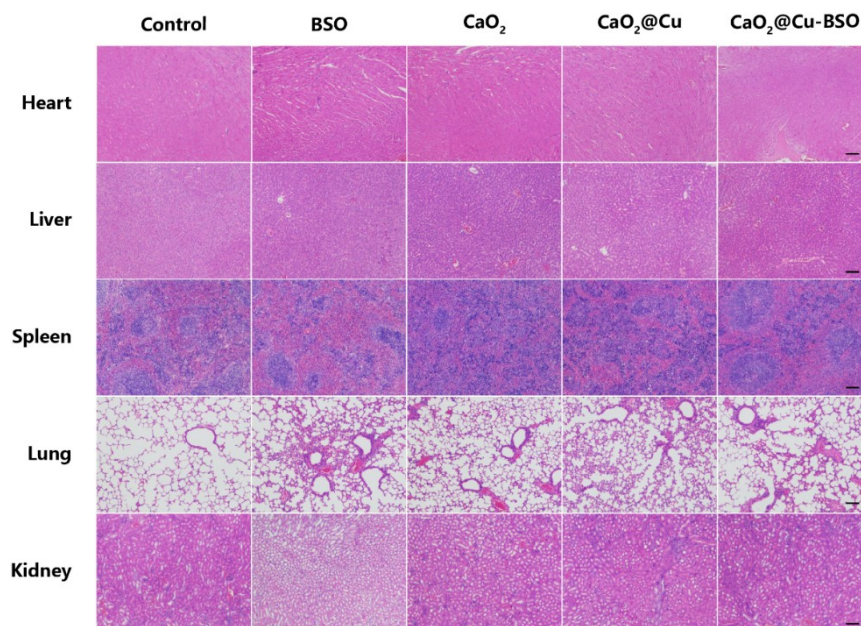

**Figure S33.** Histological analyses of tissues by hematoxylin and eosin (H&E) staining of major organs heart, liver, spleen, lung and kidney. Scale bar = 100  $\mu$ m.
